# Supplementary material
Source: HighWire-hosted journal article supplement (https://jnm.snmjournals.org/highwire/filestream/95114/field_highwire_adjunct_files/0/188375_Supplemental_Data.pdf)

**Supplemental Table 1.** The fluciclovine ( $^{18}\text{F}$ ) acquisition and interpretation training session

| Agenda item | Training module                                                   |
|-------------|-------------------------------------------------------------------|
| 1           | Amino-acid based imaging                                          |
| 2           | Historical review of fluciclovine ( $^{18}\text{F}$ ) development |
| 3           | Mechanism of uptake                                               |
| 4           | Biodistribution and Dosimetry                                     |
| 5           | Physiologic uptake patterns                                       |
| 6           | Recommended methodology for image review                          |
| 7           | Incidental uptake & variants                                      |
| 8           | Inflammation                                                      |
| 9           | Image interpretation criteria and related case reviews            |
| 10          | Demonstration cases (via video) with correct image interpretation |

**Supplemental Table 2.** Region and subject level fluciclovine (<sup>18</sup>F) PET/CT BIE outcomes compared with secondary SOT

|                  | Reader 1   |           |           | Reader 2  |           |           | Reader 3  |           |           | Overall interpretation |           |           |
|------------------|------------|-----------|-----------|-----------|-----------|-----------|-----------|-----------|-----------|------------------------|-----------|-----------|
|                  | Region     |           | Subject   | Region    |           | Subject   | Region    |           | Subject   | Region                 |           | Subject   |
|                  | P          | E-P       |           | P         | E-P       |           | P         | E-P       |           | P                      | E-P       |           |
| <b>N</b>         | 120        | 117       | 118       | 119       | 120       | 119       | 117       | 104       | 112       | 119                    | 116       | 116       |
| <b>TP, n (%)</b> | 81 ( 67.5) | 31 (26.5) | 92 (78.0) | 79 (66.4) | 32 (26.7) | 89 (74.8) | 66 (56.4) | 26 (25.0) | 78 (69.6) | 73 (61.3)              | 29 (25.0) | 84 (72.4) |
| <b>FP, n (%)</b> | 24 (20.0)  | 18 (15.4) | 20 (16.9) | 21 (17.6) | 19 (15.8) | 19 (16.0) | 12 (10.3) | 7 (6.7)   | 9 (8.0)   | 18 (15.1)              | 9 (7.8)   | 15 (12.9) |
| <b>TN, n (%)</b> | 13 (10.8)  | 62 (53.0) | 5 (4.2)   | 15 (12.6) | 63 (52.5) | 6 (5.0)   | 24 (20.5) | 64 (61.5) | 13 (11.6) | 19 (16.0)              | 69 (59.5) | 8 (6.9)   |
| <b>FN, n (%)</b> | 2 (1.7)    | 6 (5.1)   | 1 (0.8)   | 4 (3.4)   | 6 (5.0)   | 5 (4.2)   | 15 (12.8) | 7 (6.7)   | 12 (10.7) | 9 (7.6)                | 9 (7.8)   | 9 (7.8)   |
| <b>PPV (%)</b>   | 77.1*      | 63.3*     | 82.1*     | 79.0*     | 62.7*     | 82.4*     | 84.6*     | 78.8*     | 89.7*     | 80.2*                  | 76.3*     | 84.8*     |
| <b>NPV (%)</b>   | 86.7*      | 91.2*     | 83.3      | 78.9*     | 91.3*     | 54.5      | 61.5      | 90.1*     | 52.0      | 67.9*                  | 88.5*     | 47.1      |
| <b>Sens (%)</b>  | 97.6*      | 83.8*     | 98.9*     | 95.2*     | 84.2*     | 94.7*     | 81.5*     | 78.8*     | 86.7*     | 89.0*                  | 76.3*     | 90.3*     |
| <b>Spec (%)</b>  | 35.1       | 77.5*     | 20.0      | 41.7      | 76.8*     | 24.0      | 66.7*     | 90.1*     | 59.1      | 51.4                   | 88.5*     | 34.8      |

\*p<0.05. N, the number of subjects in the analysis; n, subjects in the region/subjects meeting the criterion in the analysis. CI, confidence interval; E-P, extra-prostatic; P, prostatic; Sens, sensitivity; Spec, specificity.

**Supplemental Figure 1.** ROC space analysis for the 3 readers

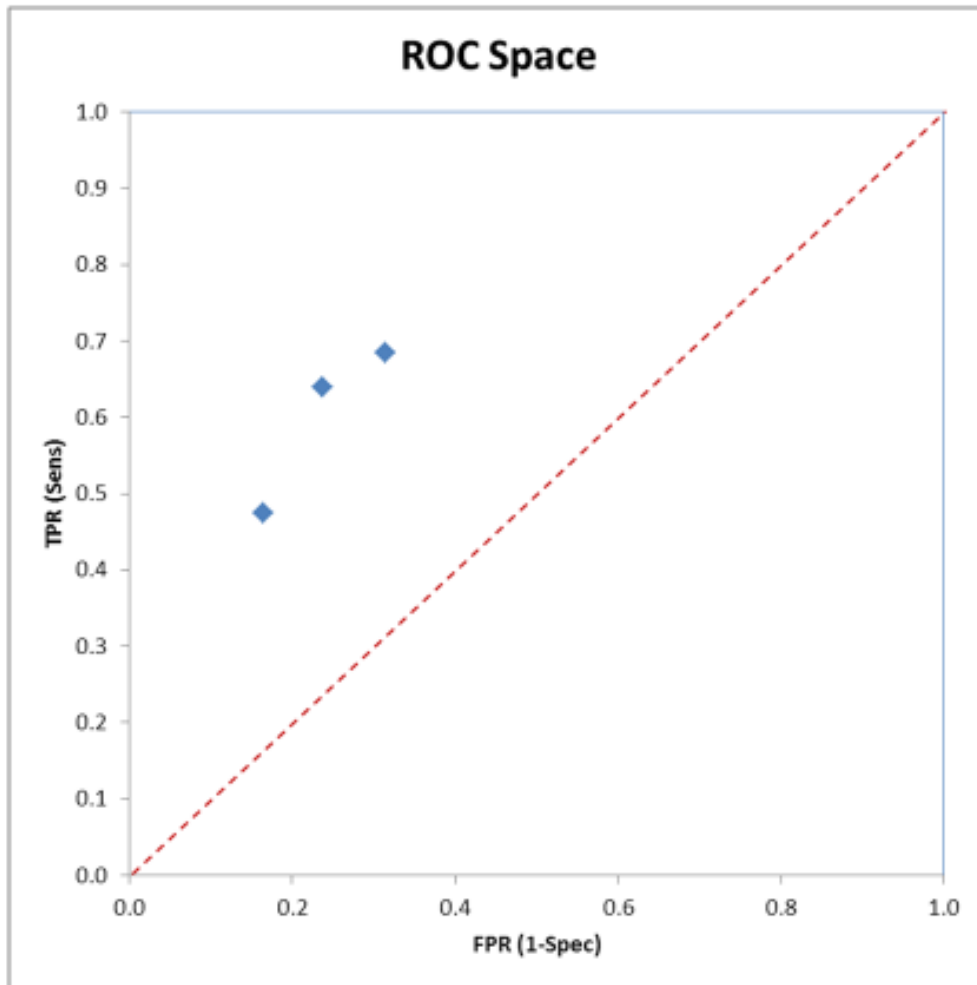

Supplement: 188375_Supplemental_Data.pdf [file 188375_Supplemental_Data.pdf]
